# Supplementary material for: The selective conversion of d-limonene to p,α-dimethylstyrene
Source: Royal Society of Chemistry journal article supplement (doi:10.1039/c4ra11558a), 2014-01-01
Supplement: c4ra11558a1.pdf [file c4ra11558a1.pdf]

## Supporting Information

### The Selective Conversion of D-limonene to *p*, $\alpha$ -Dimethylstyrene

Sandra A. Sanchez-Vazquez, Tom D. Sheppard, Julian R. G. Evans, Helen C. Hailes

#### Content

1. **Figure 1:** GC calibration curves
2. **Figure 2:** Representative GC analysis trace
3. **Figure 3:** GC analysis trace when using optimised reaction conditions (Table 2, entry 10).

# 1. **Figure 1. GC calibration curves**

## D-Limonene 1

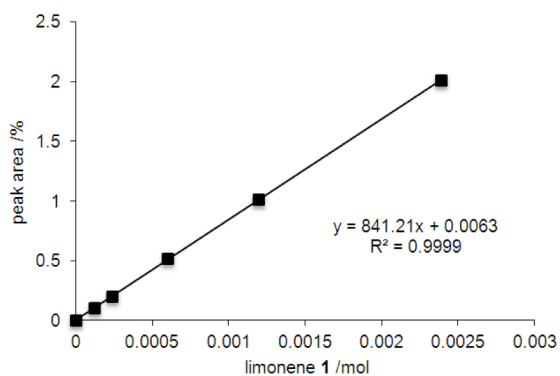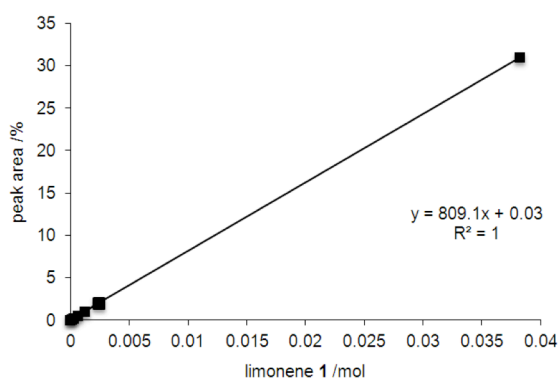

## *p*-cymene 2

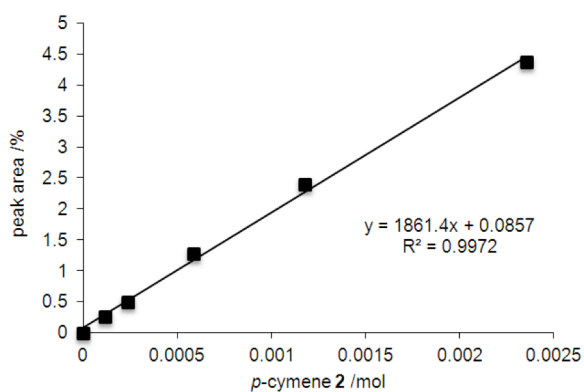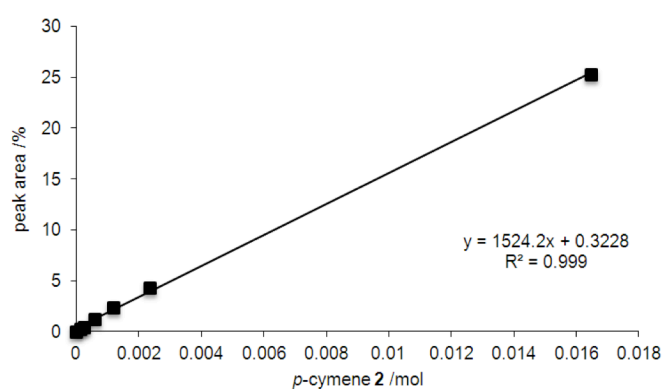

## terpinolene 3

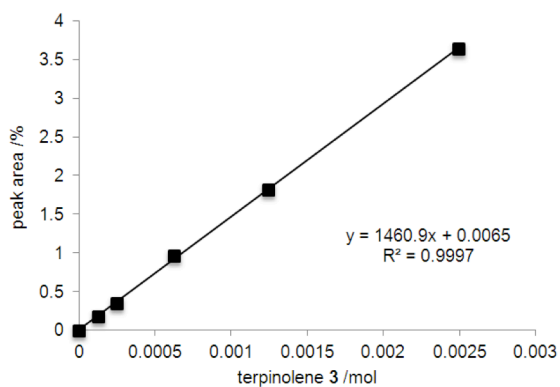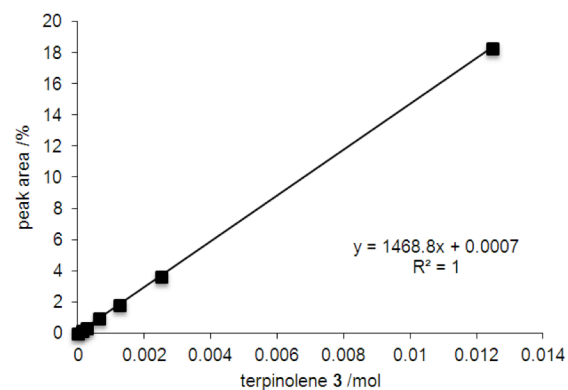

## DMS 4

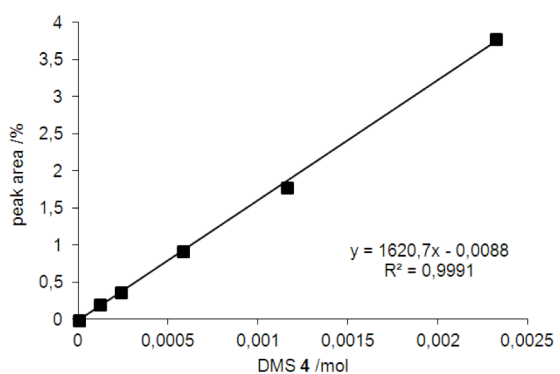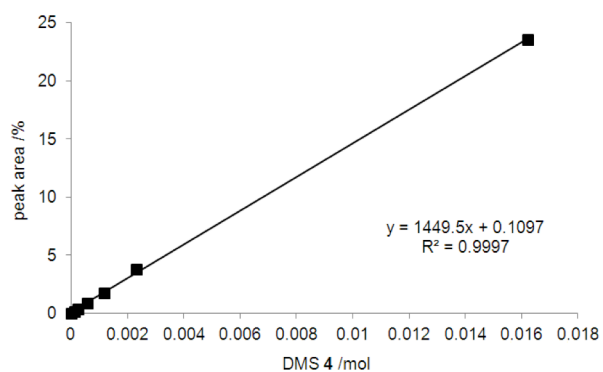

## $\gamma$ -terpinene 5

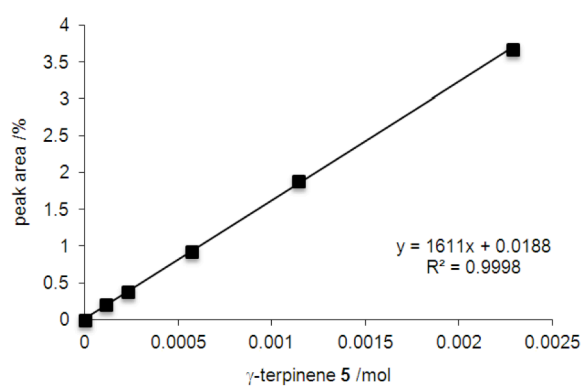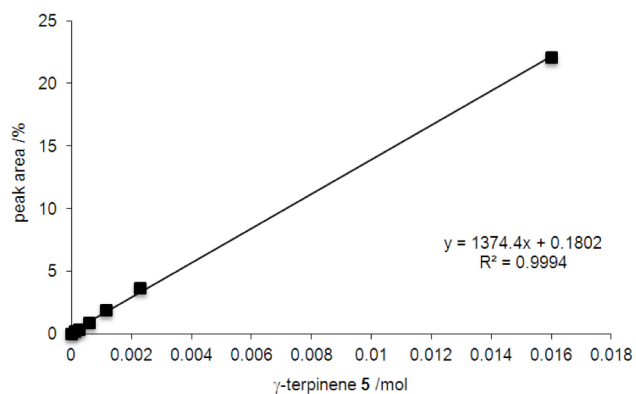

## $\alpha$ -terpinene 6

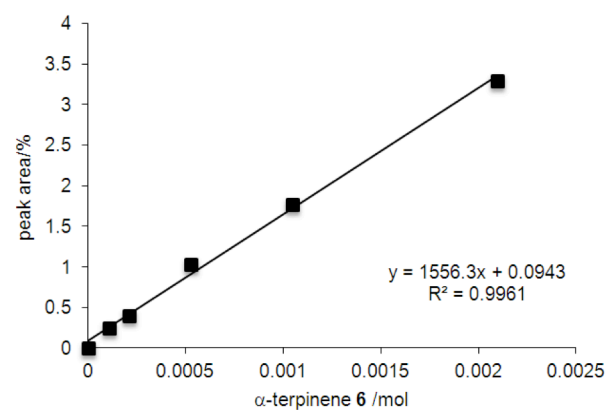

2.

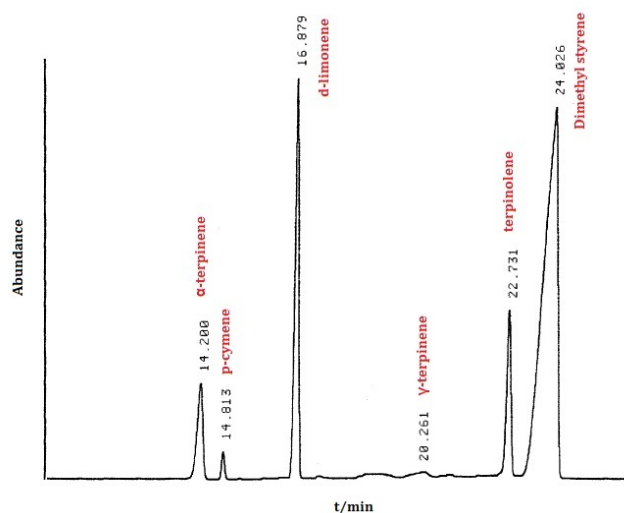

**Figure 2.** Representative GC analysis from the reaction using anhydrous DMF, anhydrous 2,6-tBu<sub>2</sub>Py, 5 mol% Pd(OTFA)<sub>2</sub>, CuCl<sub>2</sub> and 4Å molecular sieves at 80 °C under an argon atmosphere for 40 h (Table 1, entry 4).

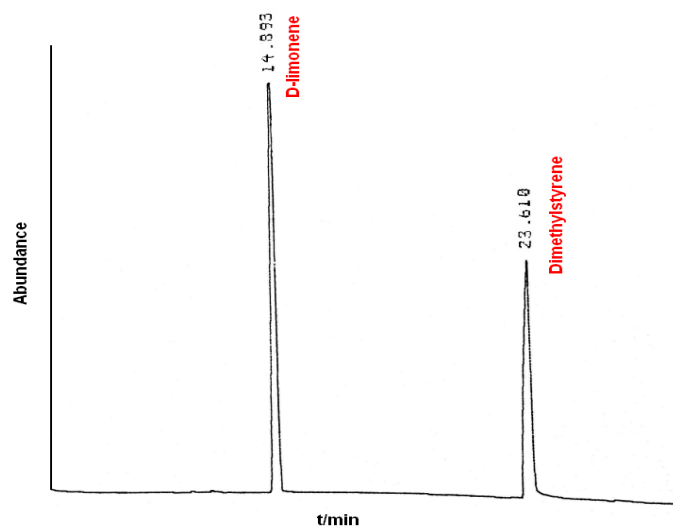

**Figure 3.** Representative GC analysis trace when using the improved reaction conditions (Table 2, entry 10).
